# Supplementary material for: A Paper-Based Cantilever Beam Mini Actuator Using Hygro-Thermal Response
Source: MDPI journal article supplement (doi:10.3390/act11030094), 2022-03-17
Supplement: s1 [file s1]

# Supplementary Information

**Manuscript ID:** actuators-1556171

**Title:** Paper-based cantilever beam mini actuator using hygro-thermal response.

**Authors:** Ireta-Muñoz Laura Alejandra , Cueva-Perez Isaias, Saucedo-Dorantes Juan José and Pérez-Cruz Angel,\*

---

## Current control

The design of a current control to supply at mini actuator was performance following the diagram show in figure S1. Where current control was designed through the value selection to Resistance 1 (R1) which was settled at 1.8 Ohm to deliver a current of 542 mA. This value changed because of the sample resistance added in series with R1.

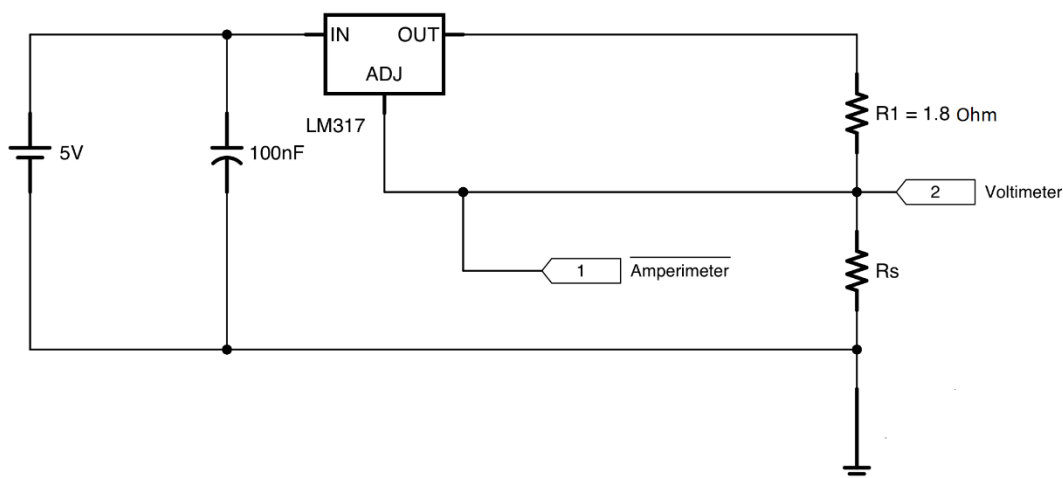

**Figure S1. Current Control Diagram.**
